# Supplementary material for: Lactoferrin-Anchored Tannylated Mesoporous Silica Nanomaterials for Enhanced Osteo-Differentiation Ability
Source: PubMed Central journal article supplement (PMC7823981; doi:10.3390/pharmaceutics13010030), 2020-12-26
Supplement: pharmaceutics-13-00030-s001.pdf [file pharmaceutics-13-00030-s001.pdf]

---

# Supplementary Materials: Lactoferrin-Anchored Tannylated Mesoporous Silica Nanomaterials for Enhanced Osteo-Differentiation Ability

Sung Hyun Noh, Han-Saem Jo, Somang Choi, Hee Gyeong Song, Hak-Jun Kim, Keung Nyun Kim, Sung Eun Kim and Kyeongsoon Park

**Table S1.** Primer sequences of OCN and OPN (the osteo-differentiation-specific genes)

| Gene | Primer (forward)           | Primer (reverse)                     |
|------|----------------------------|--------------------------------------|
| OCN  | TTG GTG CAC ACC TAG CAG AC | ACC TTA TTG CCC TGC TT               |
| OPN  | GAG GGC TTG GTT GTC AGC    | CAA TTC TCA TGG TAG TGA GTT TTC<br>C |

---

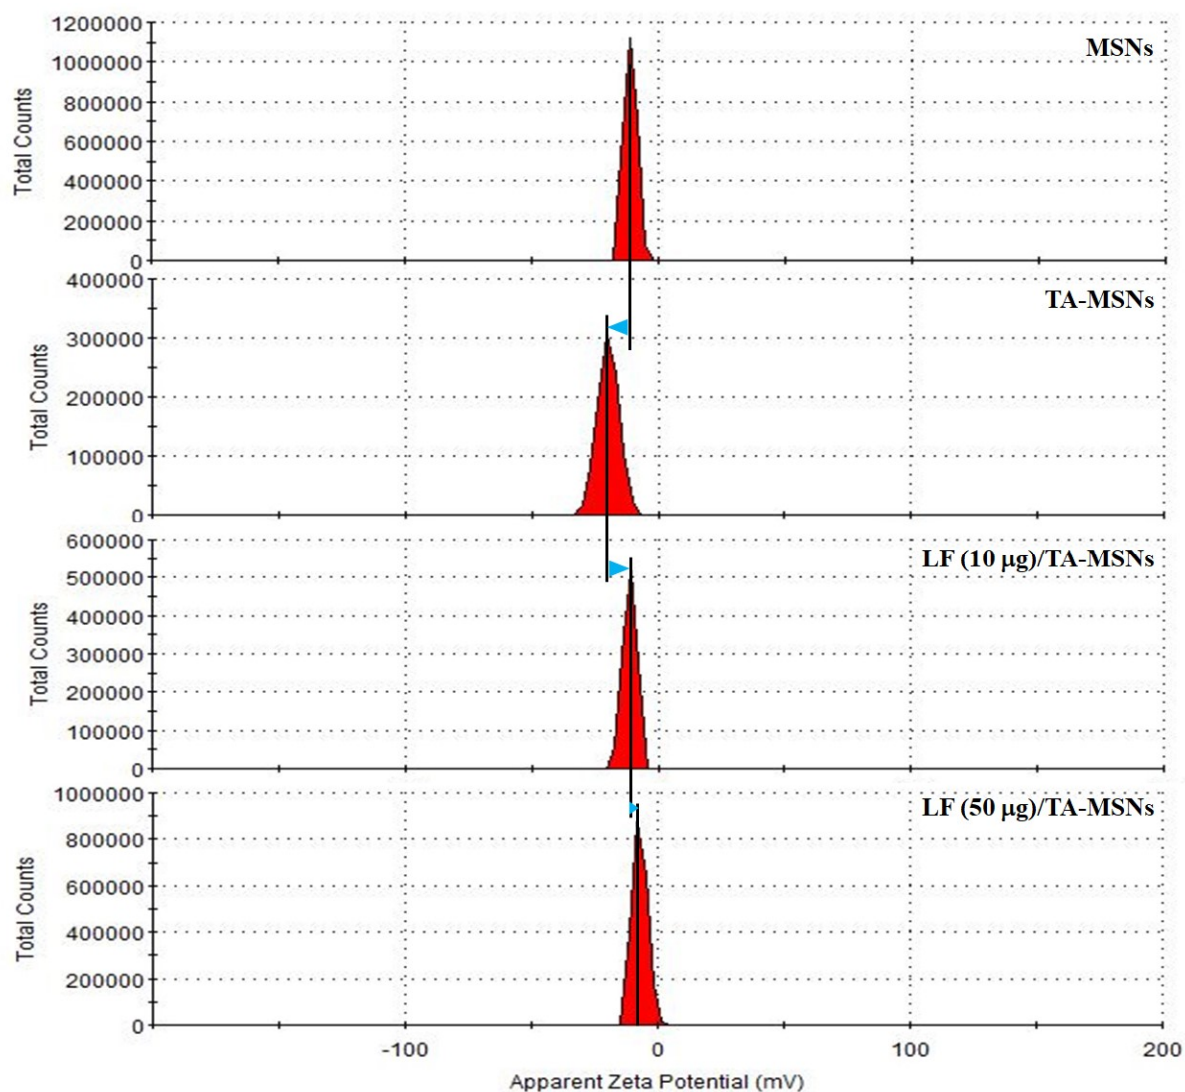

**Figure S1.** Zeta potential curves of MSNs, TA-MSNs, LF (10 µg)/TA-MSNs, and LF (50 µg)/TA-MSNs. Sky blue-colored arrow heads indicate the changes of zeta potential values after surface modification at each step.

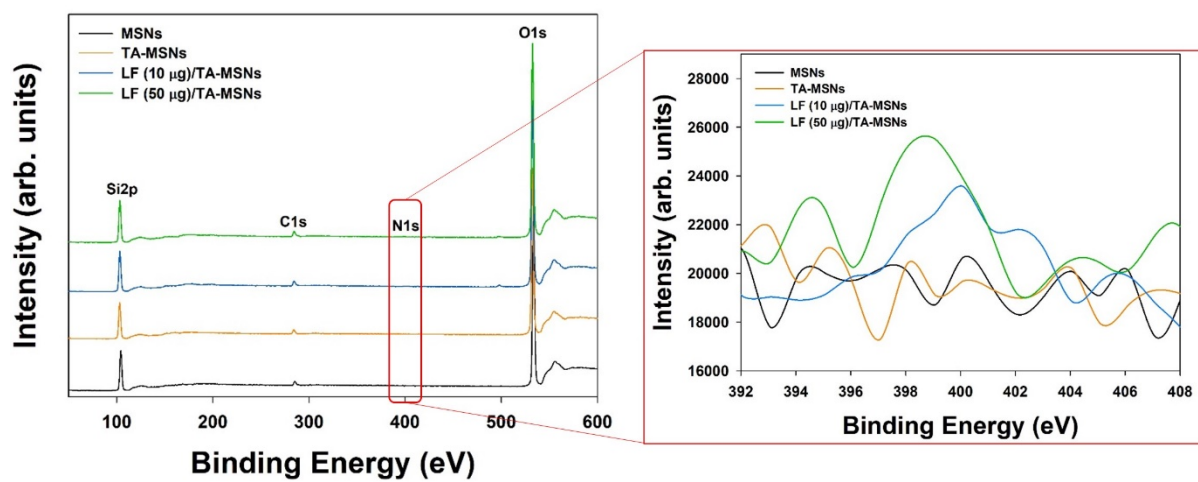

Figure S2. XPS spectra of MSNs, TA-MSNs, LF (10 µg)/TA-MSNs, and LF (50 µg)/TA-MSNs. Magnified results showed N1s peaks.
